# Supplementary material for: Self-supported Zn3P2 nanowire arrays grafted on carbon fabrics as an advanced integrated anode for flexible lithium ion batteries
Source: Royal Society of Chemistry journal article supplement (doi:10.1039/c5nr08467a), 2016-01-01
Supplement: c5nr08467a1.pdf [file c5nr08467a1.pdf]

## Supporting Information

### Self-supported $\text{Zn}_3\text{P}_2$ Nanowires Arrays Grafted on Carbon Fabrics as an Advanced Integrated Anode for Flexible Lithium Ion Battery

Wenwu Li,<sup>a</sup> Lin Gan,<sup>a</sup> Kai Guo,<sup>a</sup> Linbo Ke,<sup>a</sup> Yaqing Wei,<sup>a</sup> Huiqiao Li,<sup>a</sup> Guozhen Shen<sup>\*b</sup> and Tianyou Zhai<sup>\*a</sup>

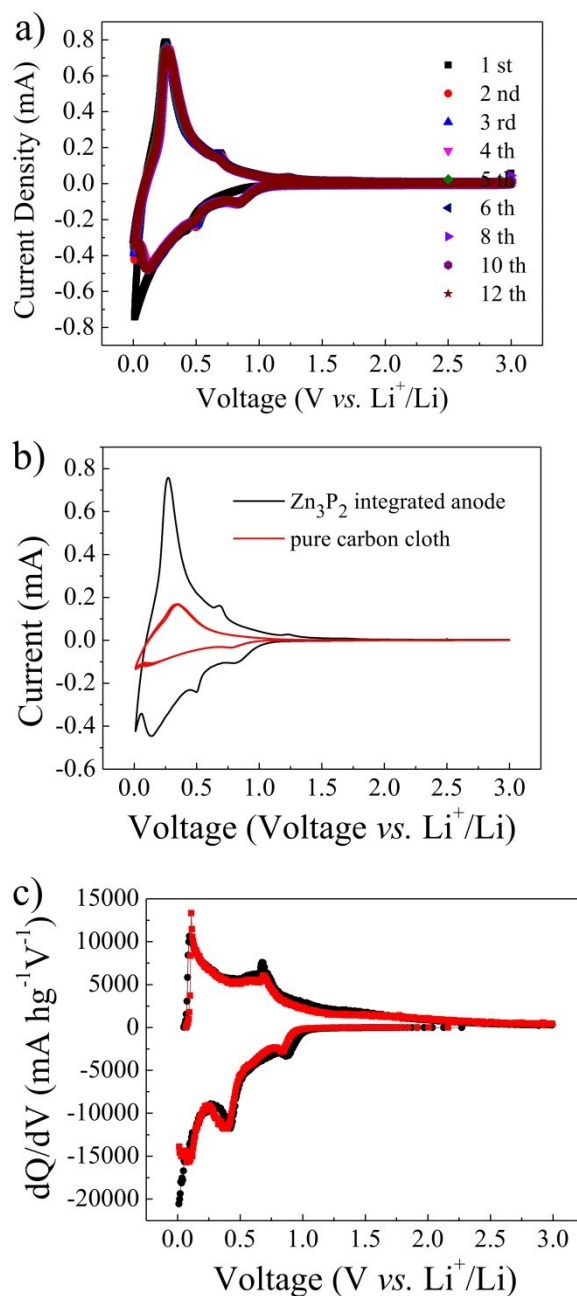

**Figure S1.** a) Cyclic voltammogram curves of the  $\text{Zn}_3\text{P}_2$  nanowires arrays/carbon fabrics integrated electrode; b) The CV comparison of  $\text{Zn}_3\text{P}_2$  integrated anode and the pure carbon cloth collector at the same area, scan rate  $0.1 \text{ mV s}^{-1}$ , potential cut-off: 0.01-3.0 V; c) the typical differential capacity-voltage plot of the  $\text{Zn}_3\text{P}_2$  nanowires arrays/carbon fabrics integrated electrode.

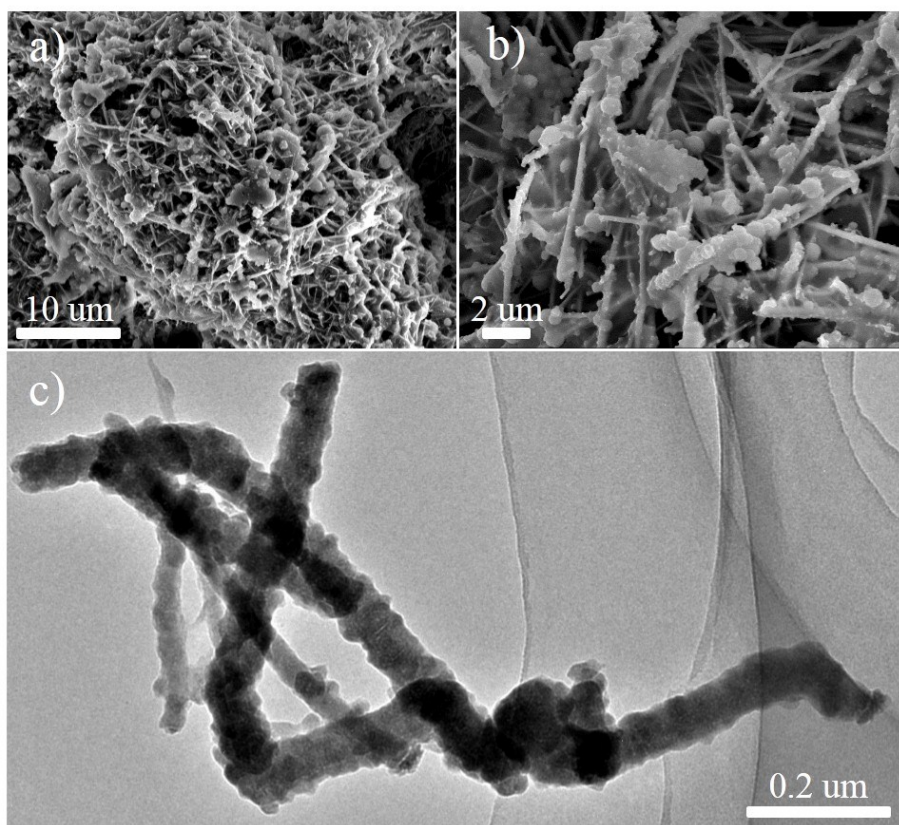

**Figure S2.** a and b) the low-magnification and high-magnification FSEM images of the integrated anodes after 20 cycles, respectively; c) the TEM images of the integrated anodes after 20 cycles.

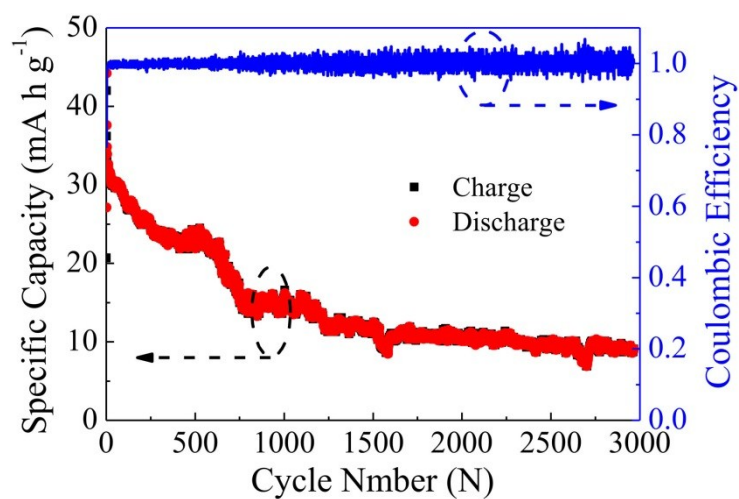

**Figure S3.** Cycle performance of the pure carbon fabrics electrode at a current density of 400 mA g<sup>-1</sup>. The low specific capacity (below 30 mA h g<sup>-1</sup>) further confirms that Zn<sub>3</sub>P<sub>2</sub> nanowires contribute main capacity of the integrated electrode.

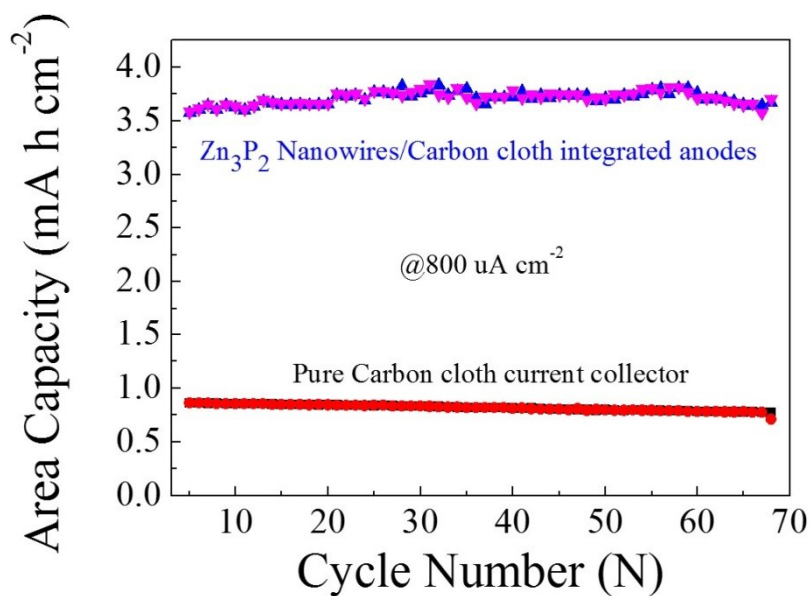

**Figure S4.** The typical cycling performance of the  $\text{Zn}_3\text{P}_2$  nanowires arrays integrated anodes and the pure carbon cloth current collector at an area current density of  $800 \mu\text{A cm}^{-2}$ .

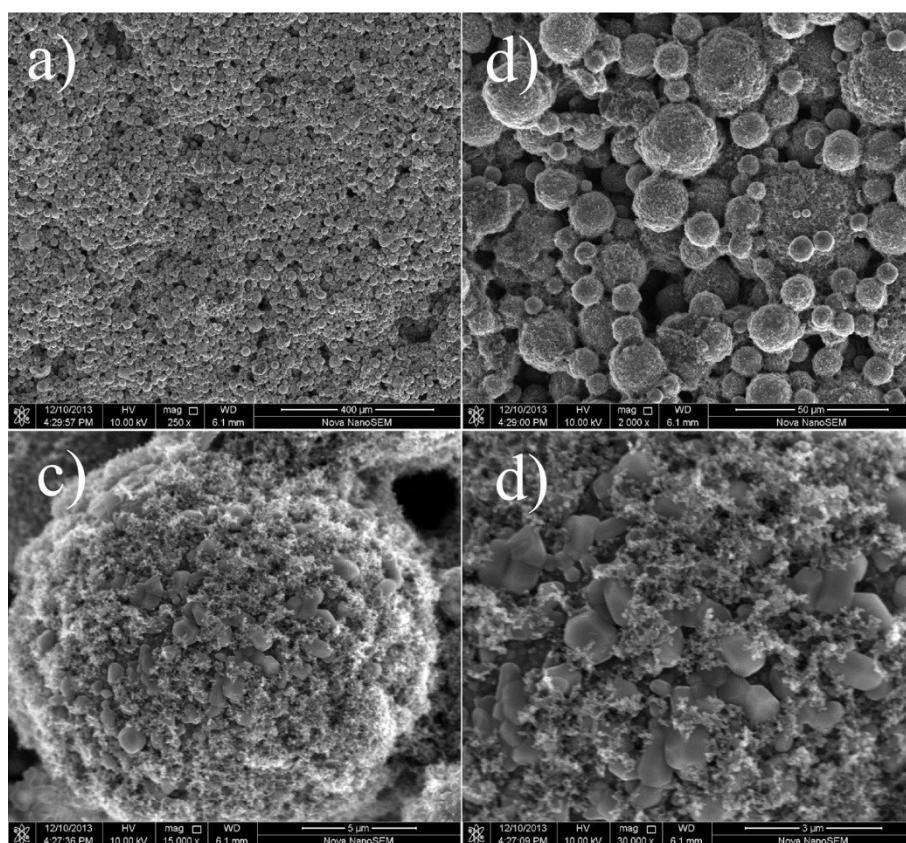

**Figure S5.** SEM images of  $\text{LiFePO}_4/\text{Al}$  foil. (commercially available)

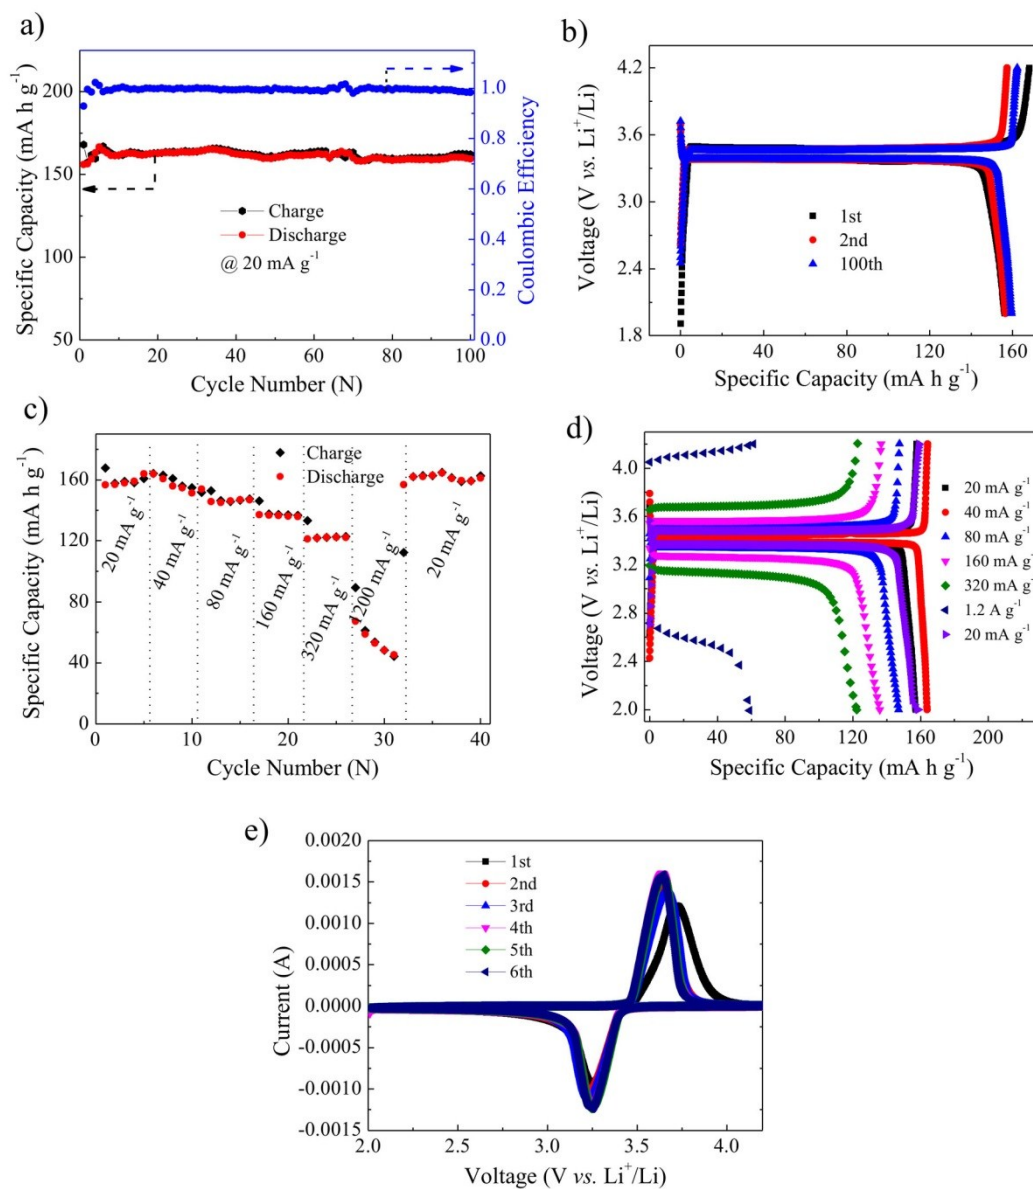

**Figure S6.** Electrochemical performances of  $\text{LiFePO}_4$ . It is worth noting that the first coulombic efficiency of the cathode is 93%.



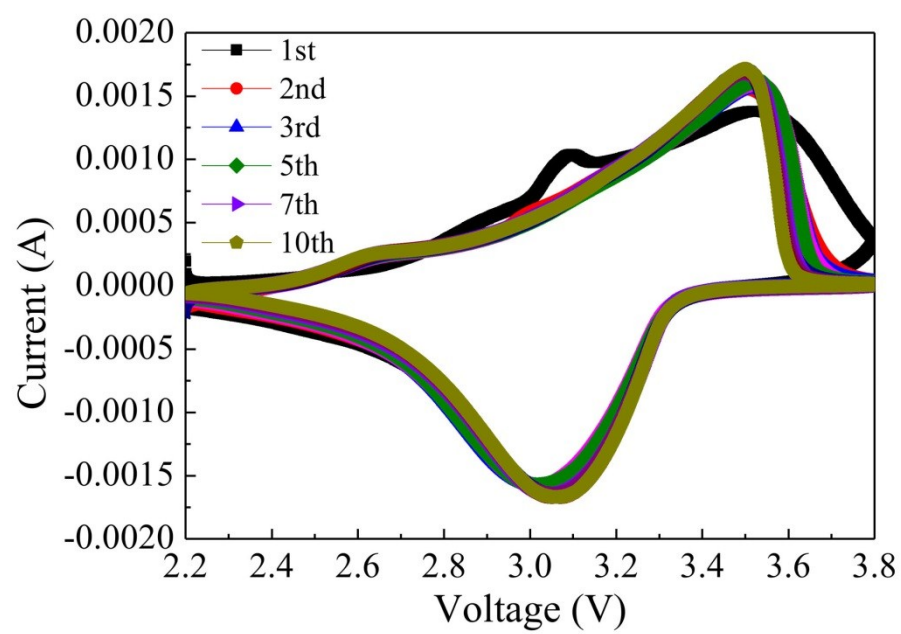

**Figure S7.** The CV curves of the flexible LIB full cell device.
